# Supplementary material for: UK universities compliance with the Concordat to Support Research Integrity: findings from cross-sectional time-series
Source: PeerJ. 2019 Jul 16;7:e7292. doi: 10.7717/peerj.7292 (PMC6640619; doi:10.7717/peerj.7292)
Supplement: Supplemental Information 3 [file peerj-07-7292-s003.xlsx]

## Sheet: Listing
University	Position Title	Name	Email	Phone number (clicks)	Mail address	info	contact	Misconduct	info	contact	Whistleblowing	info	contact	Research Integrity	University Website Url	Did anything come up?	Other route (EW)
University of Aberdeen	Secretary then Committee	None	None	None	None	4	x	4 no contact details	3	x	3 no contact details	3	x	3 no contacts details	http://www.abdn.ac.uk/sfre/goodpractice/integrity/	Yes- Guidelines but no direct person
University of Abertay Dundee	n/a	none	none	none	none	x	x	none	2	x	2 no contact details	x	x	N/A	http://www.abertay.ac.uk/media/media,2225,en.pdf	Very Vague and hard to find anything
Aberystwyth University	Secretary then Vice Chancellor	none	none	none	none	4	4	4 word document outlining imformal procedure and formal procedure	3	x	3 no contact details	3	x	6 Leads to same page as "Whistleblowing"	http://www.aber.ac.uk/en/media/V11_Public_Interest_Policy_and_Procedure21.01.10.ENG.pdf	In the informal section it suggests not only jointly resolving the issue with the plagiariser but also contacting the head of department. Allows anonymity.
Anglia Ruskin University	none	none	none	none	none	x	x	n/a	x	x	n/a	x	x	n/a	n/a	Absolutely no information on this topic.	AGREE
University of the Arts London	Rector or chairman	none	none	none	none	5	x	5- word doc unser the title of research governance, no contact details	2	x	2 no contact details just guidelines	3	x	3, word doc on research governance	http://www.arts.ac.uk/about/departments/finance/fraudawareness/whistleblowingpolicy/	Allows anonymity and is strong on confidentiality
Aston University	Vice-Chancellor, the Secretary-Registrar or the Chairman of the Council	none	none	none	none	3	x	3 Pdf no contact details	3	x	3 no contact details	2	x	2 no contact details	(non specific) http://www1.aston.ac.uk/staff/hr/policy-procedures/other/whistle/	Hardly anything on Research integrity itself and when there is it is generic and vague. Anonymity is not guaranteed.
Bangor University	N/A	none	none	none	none	3	x	3 Pdf no contact details	3	x	3 no contact details	3	x	3 no contacts details	http://rsf.bangor.ac.uk/cop.pdf	Has a research office but you have to be a student or a member of the unversity to see it
University of Bath	n/a	none	none	none	none	3	x	3 clicks no contact details pdf	2	x	2 no contact details	x	x	N/a	http://www.bath.ac.uk/health/brd/documents/researchmisconduct.pdf	Only guidelines and no procedures.
Bath Spa University	Complaints Officer	none	none	yes	yes	3	3	Word doc.	x	x	n/a	x	x	N/a	n/a	Very poor, almost nothing at all
University of Bedfordshire	n/a	none	none	none	none	x	x	n/a	x	x	n/a	x	x	n/a	n/a	Nothing at all, only some vague human resources.	AGREE
Birkbeck, University of London	Clerk of governors	none	none	none	none	3	x	3 no contact details	x	x	n/a	3	x	3 no contacts details	http://www.bbk.ac.uk/rgco/policy/Good%20Research%20Practice%20-%20May12.pdf	Lots of detail just no contat details
University of Birmingham	Registrar and Secretary	none	none	none	none	x	x	n/a just codes of practise	3	x	3 no contact details	x	x	n/a	http://www.birmingham.ac.uk/Documents/university/whistleblowing.pdf	Only has a link to the standard guidelines and no contact details
Birmingham City University	Research support	yes	yes	yes	none	4	4	4 Leads to research office	x	x	n/a	x	x	n/a just mentions the data protection act	http://www.bcu.ac.uk/research/office	Has a research office.
University of Bolton	Vice Principal	none	none	none	none	3	x	3 Pdf no contact details	x	x	n/a	3	x	3 no contacts details	http://www.bolton.ac.uk/Quality/QAEContents/ResearchAndResearchFunding/Documents/PDF/ResearchMisconduct.pdf	No research office, allows anonymity. Has the general pdf on research misconduct reporting procedure.
Bournemouth University	n/a	None	None	none	none	3	x	nothing at all	x	x	nothing at all	x	x	n/a	n/a	Nothing at all came up.	CODE OF PRACTICE, NO CONTACT DETAILS
University of Bradford	Complaints & Appeals Manager	yes	yes	none	none	3	3	academic misconduct page	3	x	3, a review of whistleblowing In the university over the last year	3	4	Statement on academic integrity (plus link to contact details)	http://www.bradford.ac.uk/impact-assessments/media/ImpactAssessments/Documents/EIA-of-Whistleblowing-policy.pdf	Not much at all
University of Brighton	n/a	None	None	None	none	x	x	n/a	x	x	n/a	x	x	n/a	n/a	almost nothing at all
University of Bristol	n/a	none	none	none	none	2	x	2 no contact details	x	x	n/a	3	x	3 no contact details pdf	http://www.bristol.ac.uk/red/research-governance/practice-training/policies-guidance/	guidelines no contacts.
Brunel University	n/a	none	none	none	none	x	x	n/a	3	x	3 no contact details	x	x	n/a	http://www.brunel.ac.uk/about/administration/university-rules-and-regulations/council-ordinances/financial-regulations/corporate-governance	only some very vague guidelines
The University of Buckingham	n/a	none	none	none	none	x	x	n/a	x	x	n/a	3	x	3 guidelines no contact details	http://www.buckingham.ac.uk/research/handbook/appendix5	detailed guidelines but no procedures.
University of Cambridge	Academic Secretary	yes	yes	yes	none	1	x	1 no contact details	3	3	3 (with contact details)	x	x	n/a	http://www.admin.cam.ac.uk/offices/hr/policy/whistleblowing.html	Very well layed out page on whistleblowing
Canterbury Christ Church University	Vice chancellor	none	none	none	none	3	x	3 Pdf no contact details	2	x	2 no contact details	x	x	n/a	http://www.canterbury.ac.uk/research/archive-pre-research/governance/documents/Research%20Misconduct%2007.pdf#search=%22misconduct%22	Some information not satisfactory enough though
Cardiff Metropolitan University	education specialist	None	None	None	none	3	x	3 Pdf no contact details	2	x	2 pdf no contact details	x	x	n/a	http://www3.uwic.ac.uk/English/Secretariat/Policies/Documents/Policies%20Approved%20By%20Board%20Of%20Governors%20December%202011/Whistleblowing%20Policy%20Dec%202011.pdf	Whistleblowing had a medium impact rating
Cardiff University	Director of governance and complaince/ Governance manager	yes	yes	yes	none	1	1	1 contact details	3	x	3 word doc, no contact details	2	x	2 no contact details	http://www.cardiff.ac.uk/govrn/cocom/academic/index.html	Brilliant page on research misconduct. Allows anonymity. Good level of information.	AGREE
University of Central Lancashire	n/a	None	None	none	none	2	x	2 no contact details	x	x	n/a	2	x	2 no contact details	http://www.uclan.ac.uk/research/graduate_research_school/files/Code_of_Conduct_for_Research_V1.1.pdf	Just gudelines and codes of conduct. No contact information anywhere and no information on procedure.
Central School of Speech & Drama	Director of research	yes	yes	yes	none	3	3	3 contact details	x	x	nothing at all	2	x	2 no contact details just guidelines	http://www.cssd.ac.uk/research/research-team	Fantastic Research office, particularly for a small university. Great research homepage. Allows anonymity.
University of Chester	n/a	None	None	none	none	x	x	n/a	x	x	n/a	x	x	n/a	n/a	Nothing at all	AGREE
University of Chichester	n/a	None	None	None	none	x	x	n/a	x	x	n/a	x	x	n/a	http://www.chi.ac.uk/about-us/mission-and-vision/core-strategies/research	A research homepage but on contact details.
City University London	n/a	None	None	None	None	2	x	2 no contact details	x	x	n/a	2	2	2 contact details	http://www.city.ac.uk/research/research/research-integrity	Good contact page and brilliant research pages. Good information. Anonymity is allowed.
Coventry University	Research Admissions Support	yes	yes	yes	yes	x	x	n/a	x	x	n/a	4	4	4 contact details	http://wwwm.coventry.ac.uk/researchnet/ResearchStudents/Pages/Contactus.aspx	A whole Research net area of the website with all the information you need. Nonymity allowed.
Cranfield University	n/a	None	None	None	none	x	x	n/a	x	x	n/a	x	x	n/a	n/a	It has an unaccessible PDF which turned up for all three search results.
University of Cumbria	Chair of the Audit Committee	yes	yes	None	none	x	x	n/a	2	2	2 pdf with email	2	2	2 pdf with email	http://www.cumbria.ac.uk/Public/HR/Documents/HRHandbook/PublicInterestDisclosurePolicy.pdf	Interesting to see that it only has an email address and a name, but otherwise it has the essentiak contact details that whistleblowers would need.
De Montfort University	Clerk	None	None	None	none	x	x	n/a	2	x	2 pdf no contact details	x	x	2 no contact details	http://www.ukrio.org/what-we-do/code-of-practice-for-research/	has the generic procedure PDF and no contact details, allows anonymity
University of Derby	Vice-Chancellor	None	None	None	none	2	x	2 pdf no contact details	x	x	n/a	x	x	n/a	http://www.derby.ac.uk/files/_misconduct_in_research_.pdf	Another generic procedure PDF and no contact details, allows anonymity
University of Dundee	n/a	None	None	none	none	2	x	2 pdf no contact details	2	x	2 pdf no contact details	x	x	n/a	http://www.dundee.ac.uk/academic/court/policy/miscinresearch.pdf	Generic Pdf, allows anonymity
Durham University	Registrar	yes	None	None	none	2	x	PDF Ensuring Sound Conduct in Research, no contact details	3	x	statement on whistleblowing, no contact details	x	x	n/a	n/a	Only information, no contact details.
University of East Anglia	n/a	None	None	None	none	2	x	2 pdf no contact details	2	x	2 pdf no contact details	2	x	2 pdf no contact details	http://www.uea.ac.uk/research/research_policies/Guideline+on+Good+practice+Document+2012	Only information, no contact details.
University of East London	n/a	None	None	None	None	x	x	word doc. No contact details	x	x	n/a	3	x	3 no contact details	http://www.uel.ac.uk/qa/manual/academic.htm	Hardly anything on Research integrity itself and when there is it is generic and vague.	AGREE
Edge Hill University	Student Information Centre Student Information Officer	None	None	None	none	3	x	3 Links to a code of research (which will be added soon) and a pdf with no contact details	3	x	3 information no contact details	x	x	n/a	http://www.edgehill.ac.uk/studentservices/studenthandbook10_11/Handbook/student_charter.html	Not much when looking for contact details, however there is plenty of information on the topic.
The University of Edinburgh	College Academic Misconduct Officer	yes	yes	yes	none	5	5	5 Pdf contact details of three people	2	x	2 Generic PDF with no contact details	6	6	6 Contact details	http://www.docs.sasg.ed.ac.uk/AcademicServices/Discipline/AcademicMisconductProcedures.pdf	Takes a lot to find the details but they are there.
Edinburgh Napier University	n/a	yes	yes	yes	none	x	x	n/a	3	3	3 contact details word doc	x	x	n/a	n/a	Not much information and some vague contact details not research specific)
University of Essex	Registrar & Secretary	None	None	None	none	2	x	2 site on authorship and plagiarism no contact details	x	x	n/a	x	x	n/a	http://www.essex.ac.uk/plagiarism/index.html	nice website but no information on how to contact someone
University of Exeter	college dean	None	None	None	none	2	x	2 information no contact details	x	x	n/a	x	x	n/a	http://www.exeter.ac.uk/staff/development/research/support/codeofpractice/misconduct/	Just a generic website on procedure with no aontact details
University of Glamorgan	head of school or university secretary	None	None	None	none	2	x	2 generic word document with hardly any information and not contact details	x	x	n/a	x	x	n/a	n/a	hardly any information at all, just a small generic word document.
Glyndŵr University	n/a	None	None	None	none	x	x	n/a	x	x	n/a	x	x	n/a	n/a	Absolutely no information on this topic.	AGREE
University of Glasgow	Human resources team	yes	yes	yes	none	x	x	n/a	3	3	3 Information with contact details at the bottom	2	x	2 Code of policy, no contact details	http://www.gla.ac.uk/services/humanresources/policies/p-z/whistleblowing/#d.en.74913	Hard to find contact details 9bottom of the page) but they were there.
Glasgow Caledonian University	n/a	None	None	None	none	x	x	n/a	x	x	n/a	x	x	n/a	n/a	Absolutely no information on this topic.
University of Gloucestershire	registrar	yes	yes	None	none	x	x	n/a	1	1	Generic information with a link that directs you to email	x	x	n/a	http://www.glos.ac.uk/supporting/studentcharter/policies/pages/studentcomplaints.aspx	Some information, including some contact details. Not satisfactory enough though
Goldsmiths, University of London	n/a	None	None	None	none	3	x	3 generic pdf no contact details	x	x	General procedural information with no contact details 2		x	ethics framework pdf no contact details	http://www.gold.ac.uk/media/ESRC_Re_Ethics_Frame_tcm6-11291.pdf	Just a generic website on procedure with no aontact details
University of Greenwich	Human resources team	yes	none	none	none	x	x	n/a	x	x	Human resources page 4 no contact details	x	x	n/a	http://www.gre.ac.uk/offices/hr/ppga/disclose	Not much at all
Guildhall School of Music and Drama	n/a	None	None	None	none	x	x	n/a	x	x	n/a	x	x	n/a	n/a	Doesn't even have a specific search function.
Heriot-Watt University	n/a	none	none	none	none	2	x	2 just a code of research conduct	2	x	2 Generic PDF with no contact details	2	x	Guidelines no contact details	http://www.res.hw.ac.uk/Research/Documents/research-code-of-conduct.pdf	Not much, only some generic information
University of Hertfordshire	n/a	none	none	none	none	2	x	2 no contact details and only for science/engineering	x	x	n/a	x	x	n/a	n/a	Only specific engineering and science information noothing much more.
Heythrop College	n/a	none	none	none	none	x	x	n/a	x	x	n/a	x	x	n/a	n/a	Very hard to navigate, nothing useful on any pages.
University of Huddersfield	n/a	none	none	none	none	2	x	2 generic Site with hardly any information and not contact details	2	x	2 generic site with no contact details	2	x	2 generic site with no contact details	http://www.hud.ac.uk/hr/policies/policymenu/index.php?id=1000297	Only generic procedural information
The University of Hull	Research Grants and Contracts Manager	yes	yes	yes	none	2	x	2 generic pdf no contact details	2	x	2 generic pdf with no contact details	2	2	2 contact details	http://www2.hull.ac.uk/administration/researchfundingoffice/staff.aspx	nothing much of use
Imperial College London	n/a	none	none	none	none	2	x	2 generic pdf no contact details	2	x	2 Generic PDF with no contact details	x	x	n/a	http://www1.imperial.ac.uk/resources/F62145FC-963B-454A-B03F-A0448ED7B3A7/whistleblowingguidancefortrainees0110101.pdf	nothing much of use	AGREE lots of policy stuff
Institute of Education	Research Ethics Coordinator	none	none	none	none	2	x	2 non-generic PDF no contact details	2	x	2 Generic PDF with no contact details	2	x	non-generic PDF no contact details	http://www.ioe.ac.uk/about/documents/About_Policies/Researchethics.pdf	Wasn’t all generic but still not very useful	Policies and procedures / Research Ethics / Ethics complaints / contact details (total = 4 clicks)
Keele University	Chancellor	yes	yes	yes	yes	3	3	3 mail address at the bottom of page	3	3	3 contact details	2	x	2 generic wor doc	http://www.keele.ac.uk/paa/governance/officersoftheuniversity/	Good staff page
University of Kent	n/a	none	yes	yes	yes	2	x	2 generic pdf no contact details	2	x	2 Generic PDF with no contact details	2	2	2 contact details	http://www.kent.ac.uk/uelt/ai/	Hard to find contact details 9bottom of the page) but they were there.
King's College London	Clerk to the Council	yes	yes	yes	none	3	3	3 contact details	4	4	4 contact details	3	3	3 contact details	http://www.kcl.ac.uk/innovation/research/support/conduct/index.aspx	Anonymity is allowed and confidentiality is always used
Kingston University	n/a	none	none	none	none	2	x	2 generic pdf no contact details	2	x	2 Generic PDF with no contact details	2	x	2 generic pdf with no contact details	http://www.kingston.ac.uk/aboutkingstonuniversity/howtheuniversityworks/policiesandregulations/documents/research_good_practice.pdf	Frustratingly impossible to find anything
Lancaster University	Human Resources Staff	none	none	yes	none	x	x	n/a	3	x	3 Generic guidelines	x	x	n/a	http://www.lancs.ac.uk/hr/staff-relations/files/whistle.html	not very developed and hardly enough contact details.
University of Leeds	n/a	none	yes	yes	none	3	x	3 generic word doc no contact details	3	x	3 Generic guidelines	3	3	3 guidelines contact details	http://researchsupport.leeds.ac.uk/index.php/policy_and_performance/uol_policies_related_to_research/policy_statement_on_professional_integrity_in_research-1/	good researc h support website
Leeds Metropolitan University	n/a	None	None	none	none	3	x	3 gneeric pdf no contact details	2	x	2 Generic PDF with no contact details	x	x	n/a	n/a	just generic stuff
University of Leicester	n/a	none	none	none	none	x	x	n/a	2	x	2 generic guidelines with no contact details	x	x	n/a	http://www2.le.ac.uk/offices/hr/policies/diff-sits/whistle?searchterm=whistleblowing	not much at all
University of Lincoln	n/a	None	None	None	none	x	x	n/a	2	x	2 Generic PDF with no contact details	x	x	n/a	n/a	"
University of Liverpool	n/a	none	none	none	none	2	x	2 just some discipline notes no contact details	2	x	2 Generic word doc with no contact details	x	x	n/a	http://www.liv.ac.uk/students/student-administration-centre/policies-procedures/conduct-discipline.htm	"
Liverpool Hope University	Vice-Chancellor and rector	yes	yes	yes	none	2	x	2 generic pdf no contact details	2	2	2 Generic PDF with contact details	x	x	n/a	http://www.hope.ac.uk/media/liverpoolhope/contentassets/documents/policiesandprocedures/media,1048,en.pdf	Good clear contact details
Liverpool John Moores University	Director of research	yes	yes	yes	none	3	3	3 site with contact details	2	x	2 Generic site with no contact details	3	3	3 site with contact details	http://www.ljmu.ac.uk/RGSO/58862.htm	Good contact detail
University of London	n/a	none	none	none	none	2	x	2 no contact details	x	x	n/a	x	x	n/a	n/a	Disppointing lack of anything
University College London	Director of academic support	yes	yes	yes	none	3	3	3 contact details	x	x	n/a	x	x	n/a	http://www.ucl.ac.uk/ras/acs/staff	Good contact page
London Business School	n/a	None	None	None	none	x	x	n/a	x	x	n/a	x	x	n/a	n/a	Absolutely no information on this topic.
London Metropolitan University	Casework Office	None	yes	none	none	3	3	3 contact details	x	x	n/a	x	x	n/a	http://www.londonmet.ac.uk/registry/$services/$coursework-exams/academic-misconduct/academic-misconduct_home.cfm	good information and some contacts
The London School of Economics and Political Science	n/a	None	None	none	none	1	x	word doc. No contact details	1	x	Ethical policy, no contact details	x	x	n/a	n/a	Nothing university specific, only talks about the coverage of whistleblowing on some of the politics courses in LSE
London School of Hygiene and Tropical Medicine	n/a	None	None	none	none	2	x	2 guidelines no contact details	x	x	n/a	x	x	n/a	http://www.lshtm.ac.uk/research/about/guidelines_on_good_research_practice.pdf#search="misconduct"	Only some vague generic guidelines
London South Bank University	Secretary of Research Cttee	None	None	none	none	2	x	2 information no contact details	2	x	2 anti fraud policy no contact details	2	x	PDF policy doc, no contact details	https://my.lsbu.ac.uk/assets/documents/regulations/academic-misconduct.pdf	Some information, no contact details
Loughborough University	n/a	yes	yes	yes	none	4	4	4 contact details	4	4	4 contact details	4	4	4 contact details	http://www.lboro.ac.uk/research/offcampus/contacts.htm	good research office
The University of Manchester	research operation	none	yes	none	none	x	x	n/a	x	x	n/a	3	3	3 contact details	http://documents.manchester.ac.uk/DocuInfo.aspx?DocID=13390	some information and some contact details
Manchester Metropolitan University	n/a	None	None	None	none	3	x	information no contact details 3	2	x	2 generic pdf no contact details	x	x	n/a	http://www.celt.mmu.ac.uk/ltia/issue9/johnston.shtml	some information targeted at students, but no contact details of any relelvance
Middlesex University	n/a	yes	yes	None	none	x	x	n/a	3	3	3 email	2	x	2 generic pdf no contact details	http://www.mdx.ac.uk/aboutus/news-events/news/Whistleblowing-procedures.aspx	Good page on whistleblowing not many contactdetails though
Newcastle University	n/a	None	None	None	none	2	x	2 only general miscondct mentioned no contact details	x	x	n/a	x	x	n/a	n/a	Not much on this topic at all
The University of Northampton	n/a	None	None	None	none	x	x	n/a	x	x	n/a	2	x	2 generic pdf no contact details	n/a	Only has the generic information
Northumbria University	n/a	none	yes	none	none	2	2	2 email	2	x	2 specific pdf no contact details	x	x	n/a	http://mynsu.northumbria.ac.uk/adviceandrepresentation/ineedadvice/academicmisconduct/	Good Academic Misconduct page
The University of Nottingham	n/a	None	None	None	none	3	x	3 policy no contact details	2	x	2 generic pdf no contact details	x	x	n/a	http://www.nottingham.ac.uk/csc/academic-integrity/student/tutorial/academic-integrity/policy-on-academic-misconduct.php	Good, specific information no contact details anywhere though.
Nottingham Trent University	Senior Pro Vice-Chancellor	n/a	n/a	n/a	n/a	1	x	1 policy doc, no contact details	x	x	n/a	x	x	n/a		LOOKED PERSONALLY BUT COULD NOT FIND ANYTHING
The Open University	n/a	none	none	none	none	x	x	Only talks about general misconduct -n/a	x	x	n/a	x	x	n/a	n/a	n/a
School of Oriental and African Studies	n/a	yes	yes	yes	none	3	3	3 leads to research office and then contact page	3	3	3 leads to research office and then contact page	3	3	3 leads to research office and then contact page	http://www.soas.ac.uk/researchoffice/staff/	Very good research office. Makes for a refreshing change!
University of Oxford	n/a	yes	yes	yes	none specific	3	3	Same Page as Research Integirty	3	3	3 contact details	3	3	3 contact details	http://www.admin.ox.ac.uk/researchsupport/contacts/	Yes- There are three divisional teams for Oxford (Humanities and arts, Science and medicine)
Oxford Brookes University	n/a	none	none	none	none	x	x	n/a	2	x	2 information no contact details	2	x	2 non-specific pdf describing the concordat	http://www.brookes.ac.uk/services/hr/handbook/performance/whistle_blowing_policy.html	Hardly anything specific, yet some good general information
Plymouth University	n/a	none	none	none	none	x	x	n/a	x	x	n/a	2	x	2 no contact details generic	n/a	Hardly any information at all
University of Portsmouth	n/a	None	None	none	none	x	x	n/a	2	x	2 specific pdf no contact details	x	x	n/a	http://www.port.ac.uk/accesstoinformation/policies/universitysecretarysoffice/filetodownload,114058,en.pdf	Basically nothing, only one generic policy
Queen's University Belfast	Research policy manager	yes	yes	yes	none	4	4	4 contact details	2	x	2 general word doc no contact details	x	x	n/a	http://www.qub.ac.uk/directorates/ResearchEnterprise/ResearchPolicyOffice/StaffContactDetails/	Very good contact details
Queen Margaret University	n/a	None	None	None	none	x	x	n/a	3	x	3 generic word doc no contact details	2	x	2 generic wor doc	n/a	Not much at all
Queen Mary, University of London	n/a	none	none	none	none	x	x	n/a	x	x	n/a	x	x	n/a	n/a	Not much at all
Royal Academy of Music	n/a	None	None	None	none	x	x	n/a	x	x	n/a	x	x	n/a	n/a	Absolutely no information on this topic.	111 page doc of regulations!
University of Reading	n/a	none	yes	yes	none	3	x	3 specific pdf no contact details	2	2	2 contact details	3	x	3 specific pdf no contact details	http://www.reading.ac.uk/internal/internalaudit/Public_Interest_Disclosure_(Whistleblowing).aspx	Good page on whistleblowing
Robert Gordon University	n/a	None	None	none	none	3	x	3 generic site no contact details	x	x	n/a	2	x	2 generic pdf no contact details	http://www4.rgu.ac.uk/academicaffairs/quality_assurance/page.cfm?pge=89892	nothing much of use
University of Roehampton	n/a	n/a	n/a	n/a	n/a	x	x	n/a	x	x	n/a	x	x	n/a	n/a	search function did not work.	found student code of conduct, no contact details
Royal College of Art	n/a	none	none	none	none	2	x	2 generic code of practise no contact details	x	x	n/a	2	x	2 generic code of practise no contact details	n/a	Nothing specfic at all
Royal College of Music, London	n/a	None	None	None	none	2	x	2 generic pdf no contact details	x	x	n/a	2	x	2 generic pdf no contact details	http://www.rcm.ac.uk/research/introduction/CUK%20Good%20Research%20Conduct.pdf	Nothing specfic at all
Royal Holloway, University of London	n/a	none	none	none	none	x	x	n/a	x	x	n/a	x	x	n/a	n/a	There was an error with the opening of the generic pdf but anything on the website (including the PDF) didn't have any contacts
Royal Veterinary College	n/a	None	None	None	none	2	x	2 generic pdf no contact details	2	x	2 public interest disclosure no contact details	x	x	n/a	www.rvc.ac.uk/About/.../PublicInterestDisclosurePolicyProcedures.pdf	Nothing much at all
Swansea University	academic registrar	none	none	none	none	x	x	n/a	2	x	2 Generic word doc with no contact details	x	x	n/a	n/a	Nothing much at all
University of Salford	n/a	none	none	none	none	2	x	2 good website on researh governance no contact drtails	2	x	2 good website on researh governance no contact details	2	x	2 good website on researh governance no contact drtails	http://www.salford.ac.uk/university/governance/policies-and-procedures/browse-by-theme/12	Good amount of information
The University of Sheffield	n/a	none	none	none	none	2	x	2 specific site no contact details	x	x	n/a	2	x	3 good website on RI but no contact details	http://www.shef.ac.uk/ris/other/gov-ethics/grippolicy/principles/definitions/integrity	Some good information, bit too formal, no contact details
Sheffield Hallam University	n/a	none	none	none	none	2	x	3 generic pdf no contact details	x	x	n/a	2	x	2 generic pdf no contact details	n/a	Nothing much at all
University of Southampton	n/a	None	None	none	none	x	x	n/a	2	x	2 specific site no contact details	2	x	2 generic site with no contact details	n/a	Only generic and specfic procedural information
Southampton Solent University	n/a	n/a	n/a	n/a	n/a	x	x	n/a	x	x	n/a	x	x	n/a	n/a	search function did not work.
University of St Andrews	Convener	none	none	none	none	2	x	2 detailed generic information no contact details	2	x	2 specific site no contact details	3	x	3 specific complaints procedure no contact details	http://www.st-andrews.ac.uk/utrec/Guidelines/complaints/	Very detailed, no contact details
St George's, University of London	n/a	none	none	none	none	x	x	n/a	x	x	no results found	x	x	n/a	n/a	Nothing at all on the topic.
Staffordshire University	n/a	none	none	none	none	2	x	2 generic word document with hardly any information and not contact details	x	x	no results found	2	x	2 generic word doc no contact details	n/a	Only one generic word doc, with not much on it anyway
University of Stirling	n/a	none	none	none	none	2	x	2 generic public interest disclosure, no contact details	2	x	2 generic public interest diclosure, no contact details	2	x	2 generic word doc no contact details	n/a	Nothing specfic at all
University of Strathclyde	n/a	none	none	none	none	2	x	2 code of practise for research (pdf) no contact details	2	x	2 generic public interest diclosure, no contact details	3	x	3 Pdf from the Uk research integrity office no contact details	http://www.strath.ac.uk/media/departments/civilengineering/research/documents/good-practice.pdf	Nothing much at all
University of Sunderland	n/a	none	none	none	none	x	x	n/a	4	x	4 public interest disclosure no contact details	3	x	3 resarch staff page no contact details	http://services.sunderland.ac.uk/academic-services/academicdevelopment/staff-dev-schedule/mpacint/	There is a reserch page but there is hardly anything on it.
University of Surrey	n/a	none	yes	yes	yes	x	x	n/a	3	x	3 no contact details	2	2	2 contact details	http://portal.surrey.ac.uk/portal/page?_pageid=1538,3342670&_dad=portal&_schema=PORTAL	<-- This is an external link with contact details on the side
University of Sussex	Head of Office of Governance and Secretariat	none	none	yes	none	3	3	3 Good information directed at students	2	2	2 contact details	x	x	n/a	http://www.sussex.ac.uk/ogs/governance/whistleblowing	Some very useful information as well as contacts on a separate page
Swansea Metropolitan University	n/a	none	none	none	none	x	x	n/a	x	x	n/a	x	x	n/a	n/a	Nothing on this topic.
Teesside University	n/a	none	none	none	none	2	x	2 good information no contact details	2	x	2 Generic word doc with no contact details	2	x	2 no contact details	http://www.tees.ac.uk/sections/stud/handbook/plagiarism.cfm	Some good information, no details though.
Trinity Laban Conservatoire of Music and Dance	n/a	none	none	none	none	2	x	2 academic quality handbook, no contact details (only email to request copy of handbook)	x	x	n/a	x	x	n/a	http://www.trinitylaban.ac.uk/about-us/academic-quality/academic-quality-handbook	Not much on this topic at all
University of Ulster	n/a	none	none	none	none	x	x	n/a	2	x	2 public interest disclosure no contact details	x	x	n/a	n/a	Nothing specfic at all
University of Wales	n/a	none	none	none	none	x	x	n/a	x	x	n/a	x	x	n/a	na	Nothing much at all
University of Wales, Newport	n/a	n/a	n/a	n/a	n/a	x	x	n/a	x	x	n/a	x	x	n/A	n/a	search function did not work.
University of Wales Trinity Saint David	n/a	none	none	none	none	x	x	n/a	x	x	n/a	x	x	n/a	n/a	Nothing at all
The University of Warwick	Head of governance support	yes	yes	yes	none	2	x	2 no contact details	3	3	3 contact details	2	x	2 no contact details	http://www2.warwick.ac.uk/services/gov/contact/	Good contact details
University of the West of England, Bristol	n/a	none	none	none	none	x	x	n/a	x	x	n/a	x	x	n/a	n/a	Nothing much at all
University of West London	n/a	none	yes	yes	none	3	3	3 research office	4	4	4 research offices	3	3	3 research office	http://www.uwl.ac.uk/research/Contact_us.jsp	Meagre but existing research office
University of the West of Scotland	n/a	none	none	none	none	2	x	2 generic pdf no contact details	2	x	2 public interest disclosure no contact details	x	x	n/a	n/a	Nothing much
University of Westminster	n/a	n/a	n/a	n/a	n/a	x	x	n/a	x	x	n/a	x	x	n/a	n/a	Need staff permissions to search anything.
The University of Winchester	n/a	none	none	none	none	2	x	2 no contact details	2	x	2 public interest disclosure no contact details	x	x	n/a	n/a	Nothing much at all
University of Wolverhampton	n/a	none	none	none	none	2	x	2 only information on how to avoid plagiarism, no contact details	x	x	n/a	x	x	n/a	http://www.wlv.ac.uk/default.aspx?page=26818	Some information, no contact details
University of Worcester	n/a	none	none	none	none	x	x	no results	x	x	n/a	x	x	n/a	n/a	Nothing at all
The University of York	n/a	none	none	none	none	2	x	2 code of practise for research (pdf) no contact details	x	x	n/a	2	x	2 code of practise, no contact details	http://www.york.ac.uk/staff/research/governance/policies/research-code/	Nothng specific at all
York St John University	n/a	none	none	none	none	x	x	n/a	2	x	2 public interest disclosure no contact details	x	x	n/a	http://w3.yorksj.ac.uk/student-admin/students/policies/whistleblowing-policy.aspx	Other than a concise Public interest disclosure page, nothing much.

## Sheet: sorted
		Name	Email	Phone number (clicks)	Mail address	info	contact	Misconduct	info	contact	Whistleblowing	info	contact	Research integrity
		None	None	None	None	1	1		1	1		2	2
		none	none	none	none	1	2		1	2		2	2
		none	none	none	none	1	3		2	2		2	2
		none	none	none	none	1	3		2	2		2	2
		none	none	none	none	2	3		2	2		2	2
		none	none	none	none	2	3		2	3		2	3
		none	none	none	none	2	3		2	3		2	3
		none	none	none	none	2	3		2	3		2	3
		none	none	none	none	2	3		2	3		2	3
		none	none	none	none	2	3		2	3		2	3
		none	none	none	none	2	3		2	3		2	3
		none	none	none	none	2	3		2	3		2	3
		none	none	none	none	2	3		2	3		2	4
		None	None	none	none	2	3		2	4		2	4
		None	None	None	none	2	4		2	4	MEDIAN	2	4	MEDIAN
		none	none	none	none	2	4		2	4	3	2	6	3
		none	none	none	none	2	4		2	x		2	x
		none	none	none	none	2	4	MEDIAN	2	x		2	x
		none	none	none	none	2	5	3	2	x		2	x
		None	None	None	none	2	x		2	x		2	x
		None	None	none	none	2	x		2	x		2	x
		None	None	none	none	2	x		2	x		2	x
		None	None	None	none	2	x		2	x		2	x
		None	None	None	none	2	x		2	x		2	x
		None	None	None	none	2	x		2	x		2	x
		None	None	None	none	2	x		2	x		2	x
		None	None	None	none	2	x		2	x		2	x
		None	None	None	None	2	x		2	x		2	x
		None	None	none	none	2	x		2	x		2	x
		None	None	None	none	2	x		2	x		2	x
		None	None	None	none	2	x		2	x		2	x
		None	None	None	none	2	x		2	x		2	x
		None	None	None	none	2	x		2	x		2	x
		None	None	None	none	2	x		2	x		2	x
		None	None	None	none	2	x		2	x		3	x
		None	None	None	None	2	x		2	x		3	x
		None	None	None	none	2	x		2	x		3	x
		None	None	None	none	2	x		2	x		3	x
		none	none	None	none	2	x		2	x		3	x
		none	None	None	none	2	x		2	x		3	x
		none	none	none	none	2	x		2	x		3	x
		none	none	None	none	2	x		2	x		3	x
		none	none	none	none	2	x		2	x		3	x
		none	none	none	none	2	x		2	x		3	x
		none	none	none	none	2	x		2	x		3	x
		none	none	none	none	2	x		2	x		3	x
		none	none	none	none	3	x		3	x		3	x
		none	none	none	none	3	x		3	x		3	x
		None	None	none	none	3	x		3	x		3	x
		none	none	none	none	3	x		3	x		3	x
		None	None	none	none	3	x		3	x		3	x
		none	none	None	none	3	x		3	x		3	x
		none	none	none	none	3	x		3	x		3	x
		None	None	none	none	3	x		3	x		3	x
		None	None	None	none	3	x		3	x		3	x
		None	None	none	none	3	x		3	x		4	x
		None	None	none	none	3	x		3	x		4	x
		None	None	none	none	3	x		3	x		6	x
		none	None	none	none	3	x		3	x		x	x
		None	None	none	none	3	x		3	x		x	x
		None	None	None	none	3	x		3	x		x	x
		None	None	None	none	3	x		3	x		x	x
		none	none	None	none	3	x		3	x		x	x
		None	none	None	none	3	x		3	x		x	x
		None	none	none	none	3	x		3	x		x	x
		none	None	None	none	3	x		3	x		x	x
		none	None	None	none	3	x		3	x		x	x
		none	none	none	none	3	x		3	x		x	x
		None	None	none	none	3	x		4	x		x	x
		None	None	none	none	3	x		4	x		x	x
		none	None	none	none	3	x		4	x		x	x
		None	none	None	none	3	x		4	x		x	x
		none	None	none	none	3	x		x	x		x	x
		None	none	None	none	3	x		x	x		x	x
		none	None	none	none	4	x		x	x		x	x
		none	none	none	none	4	x		x	x		x	x
		None	none	none	none	4	x		x	x		x	x
		none	none	None	none	4	x		x	x		x	x
		None	none	none	none	4	x		x	x		x	x
		none	None	None	none	5	x		x	x		x	x
		none	None	none	none	5	x		x	x		x	x
		none	none	none	none	x	x		x	x		x	x
		none	none	none	none	x	x		x	x		x	x
		None	none	none	none	x	x		x	x		x	x
		none	none	none	none	x	x		x	x		x	x
		none	none	None	none	x	x		x	x		x	x
		none	none	none	none	x	x		x	x		x	x
		none	none	none	none	x	x		x	x		x	x
		none	none	none	none	x	x		x	x		x	x
		none	none	none	none	x	x		x	x		x	x
		none	none	none	none	x	x		x	x		x	x
		none	none	none	none	x	x		x	x		x	x
		none	none	none	none	x	x		x	x		x	x
		none	None	none	none	x	x		x	x		x	x
		none	none	none	none	x	x		x	x		x	x
		none	none	none	none	x	x		x	x		x	x
		none	none	none	none	x	x		x	x		x	x
		none	None	None	none	x	x		x	x		x	x
		none	none	none	none	x	x		x	x		x	x
		none	none	none	none	x	x		x	x		x	x
		none	none	none	none	x	x		x	x		x	x
		none	none	None	none	x	x		x	x		x	x
		none	none	none	none	x	x		x	x		x	x
		none	yes	none	none	x	x		x	x		x	x
		none	yes	none	none	x	x		x	x		x	x
		none	yes	none	none	x	x		x	x		x	x
		none	yes	none	none	x	x		x	x		x	x
		none	yes	yes	none	x	x		x	x		x	x
		none	yes	yes	none	x	x		x	x		x	x
		yes	yes	yes	none	x	x		x	x		x	x
		yes	yes	yes	none	x	x		x	x		x	x
		yes	yes	yes	none	x	x		x	x		x	x
		yes	yes	yes	none	x	x		x	x		x	x
		yes	yes	yes	none	x	x		x	x		x	x
		yes	yes	yes	none	x	x		x	x		x	x
		yes	yes	yes	none	x	x		x	x		x	x
		yes	yes	yes	none	x	x		x	x		x	x
		yes	yes	yes	none	x	x		x	x		x	x
		yes	yes	yes	none	x	x		x	x		x	x
		yes	yes	yes	none	x	x		x	x		x	x
		yes	yes	yes	none	x	x		x	x		x	x
		yes	yes	yes	none	x	x		x	x		x	x
		yes	yes	yes	none	x	x		x	x		x	x
		yes	yes	yes	none	x	x		x	x		x	x
		yes	yes	yes	none	x	x		x	x		x	x
		yes	yes	yes	none	x	x		x	x		x	x
		yes	yes	yes	none	x	x		x	x		x	x
		yes	yes	yes	none	x	x		x	x		x	x
		yes	yes	yes	none specific	x	x		x	x		x	x
		yes	yes	yes	yes	x	x		x	x		x	x
		yes	yes	yes	yes	x	x		x	x		x	x
		yes	yes	yes	yes	x	x		x	x		x	x
		yes	yes	yes	yes	x	x		x	x		x	x
		yes	yes	yes	yes	x	x		x	x			x
RESULTS
	Yes =	25	31	27	5	median	3		median	3		median	3
	No =	109	103	107	129
