# Supplementary material for: UK universities compliance with the Concordat to Support Research Integrity: findings from cross-sectional time-series
Source: PeerJ. 2019 Jul 16;7:e7292. doi: 10.7717/peerj.7292 (PMC6640619; doi:10.7717/peerj.7292)
Supplement: Supplemental Information 4 [file peerj-07-7292-s004.xlsx]

## Sheet: US
Top US universities	RIO	Whistle-blower	Research misconduct	Name	email	phone	address
Harvard	1	1	2	y	y	y	n	Please see Gearoid Griffin (x5-9204), Research Integrity Officer, for any issues concerning research misconduct.
Princeton	2	2	x	n	y	y	y	You may submit a confidential report directly to RIA by phone at 609-258-3321, email ria@princeton.edu, or by mail to Princeton University, Research Integrity and Assurance, P.O. Box 36, Princeton, NJ 08544-0036.
Yale	x	x	3	y	y	y	y	Office of Academic Integrity
Columbia	2	x	2	y	y	y	n	Research compliance
U Chicago	x	1	2	y	y	y	n
MIT	1	x	2	n	y	y	y	Ombuds Office
Stanford	1	x	2	y	y	y	n
Duke	1	x	1	y	y	y	y
U Penn	3	x	2	y	y	n	n
Cal Inst Tech	1	x	2	y	y	y	n	Office of Research Compliance
Median	1	1	2
			YES	8	10	9	4
			NO	2	0	1	6

## Sheet: Australia
Australia	RIO	Whistle-blower	Research misconduct	Name	email	phone	address
Melbourne	1	2	1	y	y	y	y	Office for Research Ethics & Integrity
Australian National Univ	3	x	3	y	y	y	y	Office of Research Integrity
U Sydney	1	x	2	y	y	y	n
U Queensland	1	x	2	y	y	y	n
U NSW	3	x	1	y	y	y	n
Monash	1	1	1	y	y	y	y
U Adelaide	1	x	2	n	y	y	y	Office of Research Ethics, Compliance & Integrity
U Western Australia	2	2	2	y	y	y	y
Macquarie	3	x	2	y	y	y	n
Queensland U Tech	2	x	x	y	y	y	n
Median	1.5	2	2
			YES	9	10	10	5
			NO	1	0	0	5
