# Supplementary material for: UK universities compliance with the Concordat to Support Research Integrity: findings from cross-sectional time-series
Source: PeerJ. 2019 Jul 16;7:e7292. doi: 10.7717/peerj.7292 (PMC6640619; doi:10.7717/peerj.7292)
Supplement: Supplemental Information 5 [file peerj-07-7292-s005.xlsx]

## Sheet: Total response
Institution	Annual statement for 13/14	URL	Date published	Notes	Length
Aberdeen	no			no cases (email)
Anglia Ruskin	statement but nothing on cases	http://ww2.anglia.ac.uk/ruskin/en/home/research/research_at_anglia_ruskin/research_services/research_policy.html		"The Working Group concluded that ARU is compliant with the Concordat"	1
Bath	no	http://www.bath.ac.uk/research/governance/		working on it (April 15)
Brunel	no			will present a statement on the formal investigations of research misconduct that have been undertaken to the Council of the University on 7 May 2015 as part of its Annual Report on research ethics activities.
City	no			it is something that we have been discussing and may do in the future.
Edinburgh	no			will start in 2015 for 14/15
Exeter	no			planning to do this
Glasgow	no
Herts	yes	Research Integrity 2013-2014	2014-10-01		2
Huddersfield	yes	http://www.hud.ac.uk/research/strategyandpolicy/			4
Hull	no
Lancaster	yes	www.lancaster.ac.uk/depts/research/documents/2Report%20to%20Council%20from%20UREC%209%20April.pdf		will probably have different format next year	9
Leicester	statement but nothing on cases	https://www2.le.ac.uk/offices/researchsupport/research-integrity		statement requires log in
Liverpool	no			awaiting appointment of new VC
Loughborough	no
Manchester	no
Nottingham	yes	http://www.nottingham.ac.uk/research/research-integrity.aspx	undated		7
Nottingham Trent	yes	http://www.ntu.ac.uk/research/research_at_ntu/research_integrity/index.html			2
Oxford	yes	http://www.admin.ox.ac.uk/media/global/wwwadminoxacuk/localsites/researchsupport/documents/integrity/Compliance_with_the_Concordat_to_Support_Research_Integrity.pdf	2015-03-01		8
Portsmouth	no
Queen's Belfast	yes	http://www.qub.ac.uk/directorates/ResearchEnterprise/ResearchGovernanceandEthics/			2
QMUL	no
Roehampton	no
Sheffield	yes	http://www.sheffield.ac.uk/ris/other/gov-ethics/index	2014-11-01		13
St George's	no
Sussex	yes	http://www.sussex.ac.uk/research/standards	2014-07-01		10
UCL	no			discussing this
Warwick	no			planning to do this
Westminster	no
Total response		Total UKRIO members = 44
29
yes=	9			Median	5.5
report only=	2
no=	18

## Sheet: Analysis
Institution	Cases	Notes	No. cases
Sheffield	"2 formal actions"	both plagiarism by "research students"	2
Herts	2 cases under investigation	both plagiarism by "research degree students"	2
Huddersfield	"no formal investigations"	most recent investigation was in 2012	0
Nottingham	2 formal investigations	postgrad research students (no cases involving staff)	2
Nottingham Trent	"no formal investigations"	for research students or staff "no reported cases of alleged research misconduct during 2013/14"	0
Lancaster	"one investigation ..in the past 3 years; the case was not upheld"		1
Oxford	6 allegations, 3 dismissed, 1 upheld, 2 ongoing	3 dismissed (2 plagiarism, 1 falsification) 1 upheld (falsification), 2 ongoing (authorship)	6
Anglia Ruskin		"The Working Group concluded that ARU is compliant with the Concordat"	not reported
Queen's Belfast	"3 concerns raised regarding researchers … all related to concerns around authorship"	1 dismissed "at an early stage", 2 staff members interviewed by initial screening panel -- decided there was no misconduct	3
Sussex	6 cases in 11/12 and 12/13 = 3 plagiarism, 1 fabrication, 1 falsification, 1 breach to duty of care.	"Following a preliminary investigation … none of the allegations were upheld in whole or in part"	6
Teesside	"no formal allegations … for staff" "3 investigations at doctoral level"	1 allegation of plagiarism upheld, ongoing investigation or data fabrication, allegation of confidentiality breach is in the screening stage	3
York	"no cases of academic misconduct by a research student during 2013/14"		0
Cambridge	"no formal investigations into allegations of research misconduct during 2013-14"		0
		Median	2

## Sheet: Non-RIO
Institution	Annual statement for 13/14	URL	Date published	Notes	Length (pages)		Length (RIO subs)
University of the Arts London	no
Bangor University	no
University of Bedfordshire	no
Birmingham City University	no
Bournemouth University	no
University of Brighton	no
University of Cambridge	yes	http://www.research-integrity.admin.cam.ac.uk/sites/www.research-integrity.admin.cam.ac.uk/files/research_integrity_report_to_council_2013-14.pdf	2014-11-24	no formal investigations in 2013-14	7
Cardiff Metropolitan University	no
University of Chichester	no			have detailed action plan
Cranfield University	no			misconduct policy Oct 2014
University of Derby	no			interesting FoI request
University of East Anglia	no			intranet pages needed login
Edinburgh Napier University	no
University of Glamorgan	no
Glasgow Caledonian University	no
University of Greenwich	no
Heriot-Watt University	no
Imperial College London	no
Keele University	no
Kingston University	no?	says report will be published Nov 2014!
Leeds Beckett University	no
Liverpool John Moores University	no
London Business School	no
The London School of Economics and Political Science	no
London South Bank University	no
Middlesex University	no
The University of Northampton	no
School of Oriental and African Studies	no	FoI request says 1 allegation (not upheld) in last 3 yrs		Policy says annual statement will be published on website but couldn't find it
Plymouth University	no?	http://www1.plymouth.ac.uk/research/support/Ethics/Documents/Plymoutn%20Unversity%20Integrity%20Assurance%20Statement.pdf		Assurance statement on compliance with concordat but no mention of cases
Royal Academy of Music	no
Robert Gordon University	no
Royal College of Music, London	no
Royal Veterinary College	no
University of Salford	no
Southampton Solent University	no			website includes link to Concordat
Staffordshire University	no		FoI request	website includes link to Concordat
University of Strathclyde	no
Teesside University	yes	http://www.tees.ac.uk/docs/docrepo/research/University%20Annual%20Statement%20on%20Research%20Integrity%202013-14.pdf	2014-10-01		10
University of Ulster	no
University of Wales, Newport	no						2
University of the West of England, Bristol	no			has new policy (2p) referring to Concordat			1
University of the West of Scotland	no						4
University of Wolverhampton	no			FoI request -- no cases			9
The University of York	yes	https://www.york.ac.uk/media/staffhome/research/documents/researchgovernance/research%20integrity%20statement%20to%20Council%202014.pdf	2014-06-01	formally endorses Concordat	2		2
						7	8
Total	44					10	2
yes	3					2	13
no	41				Median length	7	10
							7
planned	2						10
							2
							5.5

## Sheet: Sheet3
Institution	Annual statement for 13/14	URL	Date published	Notes
York	yes			mentioned by Warwick
